# Supplementary material
Source: PubMed Central journal article supplement (PMC3109543)

### **Figure S1. Sequence alignment between mouse and human HS-E1**

Mouse (top line) and human (bottom line) genomic DNA sequences from the region to which HS-E1 maps in both species were aligned using Pipmaker (<http://pipmaker.bx.psu.edu/pipmaker/>).<sup>22</sup> Coordinates for the mouse sequence refer to the transcription start site for the mouse  $\epsilon\gamma$ -globin gene, in which the first A in the sequence “GTACGTA~~CTT~~GCTTCTG” is defined as +1. Coordinates for the human sequence refer to the transcription start site for the human  $\epsilon$ -globin gene, in which the first A in the sequence “GCACATATCTGCTTCCG” is defined as +1.

### **Figure S2. Blood cytopins comparing wild type and mutant peripheral blood from E12.5 litter mates**

Representative Wright stain microscope fields from two wild type (WT) and two mutant ( $\Delta$ HS-E1) littermates show no gross differences in red cell maturation and morphology. Cells were cytopun (Shandon cytopsin II, Thermo-Scientific, Waltham, MA) on plain glass slides, Wright stained (Sigma Aldrich WSHT), and mounted with Permount. Images were acquired on a Nikon DS-Fi1 camera on a Nikon Eclipse 80i microscope (Nikon, Chiyoda-ku, Tokyo, Japan) using Nikon Plan Fluor objective lens (Nikon, 20 $\times$  magnification, 0.5 NA). Images were processed by Nikon Elements software for white balance and brightness. The scale bars in the lower right corners of each panel indicate 50  $\mu$ m.

# Figure S1

Mouse 7569 TAAAGAATCAGCAGTCACAGGATTTCTGACTCAAGAAATGGTATTACTAAGAAAAATATTCTT AAGGATCCAATTT  
Human 2427 TAAACGATAAGCA TTAGGATGTTAAGTGACTCAGGAAATAAGATTGTTGGAAAAAATAATCTGCTTATGTGCACAAAATGGATTCAGTTTGCAGAT

Mouse 7645 AACTTAAATGCTTAGGAATCAATTACAG AGATATAAAAAGTTTAAAATGAAGAGGTGAAGCAAGGC ATGCAACCCGAGGTAATGTTCAAAGGTGGG  
Human 2524 AAAATAAAATA TGATGATGATGATTCAAAGGACAGATACAATGGTTCAAACCAAGAGGAGCAGTGAGTCTGTGAAATTTGAAAGGATGACAAAGGTGGG

Mouse 7739 GTGGGGGAGCAGCGT CAGATTAAC TCTAATATATGAGAAGAAACAAGA CAGTAGAAGA TGAAATCAAAAATAC TGAGTGGACATAACTACAT  
Human 2624 GTGAGAAA GACATAGTATTCGACCTGACTGTGGGAGATGAGAAGGAAGAAGGAGGTGATTAATGACTGAAAGCTCCGACAGTG GTGAAGA TAACAGGAG

Mouse 7833 AAAG TGTACATTGACTTGGA AAACTCATGTGGGTAAAA CACACTTGAGAGAATTTAAAGGTGCTCAAAGAAATTC  
Human 2723 GAAACCATGCAC TTGACCCTGGTGACTCTCATGTGTGAAGGGTAGAGGGATATTAACAGATT TAC TTTTAGGAAAGTCTAGATTGGTCAAGGAGTTT

Mouse 7908 AAGCC CTAGTCAATCTCTTGTCAAGGCTGGTGATCTTTAAGTGGTAGAGGTAAGAGAACCACATTTTAACTAATA AACTATATTCCCTCATCC  
Human 2822 GACCTTCAGGCTTGTGTCTTCATATCAAGG AACCTTTCATTTTCCAAGTTAGAGTGCCATATTTTGGCAAATAA ACTTTATTAG

Mouse 8001 TGATTCATAG ATTGGTTAGAGTATGACTGGTGGATTGTATTTAAGTTGCTTTGTCCACTTTAAATAAG AAAGAACAATGATCT  
Human 2910 TAA TTTTATAGTGCTCTCACATTGATCAGACTTTTCTGTGAATTACTTTTGAATTTGGCTGTATATATCCAGAAATGAGGAGAGACAAATAATAT

Mouse 8088 TGTAGTTT CAGGCATCAACAACATTGGCCTTTTGGTCTACAGCATTTCATATG GCAA TAAACAGGAAAACAACC AAACCAAACAACAATAAC  
Human 3010 TGTAGTTG CAGGCATCAACAATCTGGTCTCTCTGAGCCTTATAA CCTTTCAATA TGCCCA TAAACAGAGTAA

Mouse 8185 AACAAAAATG CAGGTTGTATATGACACTCAAATAGTTTCTCTGGACCTGTC AAGAGAT GAGACAATGCCAATTTTT ATAAA TTTCTTTTCC  
Human 3085 ACAGGGA TTTATTCA TGCCACTAAA TATTTTCACTAGTCACTACAAAATGAGGCAATGTGCAATTTTGTATACATATTTTATA

Mouse 8283 CTTATG  
Human 3174 TTTATG

Figure S2

WT

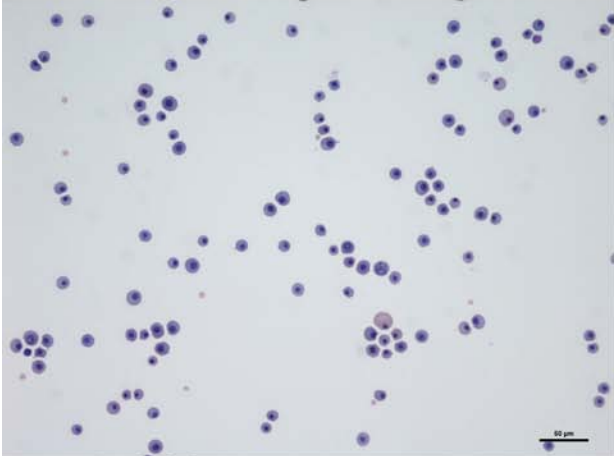

$\Delta$ HS-E1

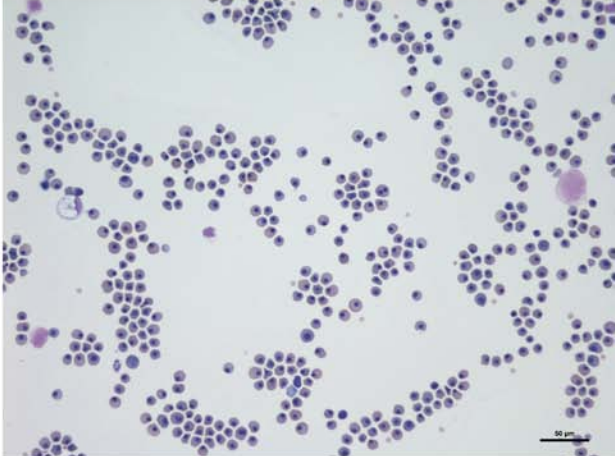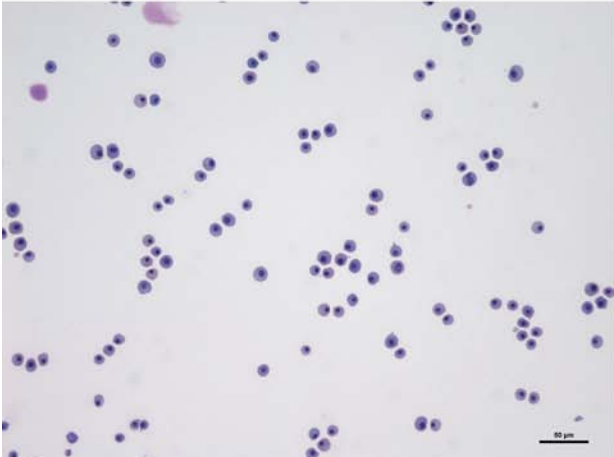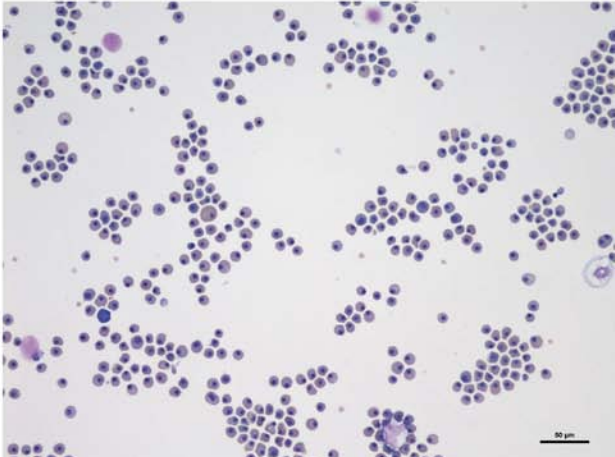

Supplement: supp_blood-2010-08-302018_Document1.pdf [file supp_blood-2010-08-302018_Document1.pdf]
